# Supplementary material for: Research on Property of Multicomponent Thickening Water Fracturing Fluid and Application in Low Permeability Oil Reservoirs
Source: Hindawi journal article supplement (doi:10.1155/2018/1231490), 2018-06-13
Supplement: f1 [file 1231490.f1.xls]

## Sheet: table3-1
			砂比/%	沉降速度/（mm.s-1）
				60 mPa.s		90 mPa.s		120 mPa.s
				稠化水	胍胶	稠化水	胍胶	稠化水	胍胶
			5	0.02973	0.04136	0.02461	0.03162	0.02016	0.02914
			10	0.07823	0.09161	0.07012	0.08136	0.06812	0.07216
			20	0.11986	0.14161	0.11014	0.13264	0.10011	0.12234
			30	0.14832	0.17214	0.14036	0.16213	0.13613	0.15614
			40	0.19213	0.21463	0.18214	0.20436	0.17614	0.19632

## Sheet: table3-2
			时间/min	表观粘度/（mPa.s）
				50 ℃		60 ℃		70 ℃
				稠化水	胍胶	稠化水	胍胶	稠化水	胍胶
			10	94.3	115.6	80.3	100.2	50.2	70.2
			30	72.6	96.5	60.1	79.2	26.2	50.6
			60	40.2	62.4	30.6	45.8	12.3	30.7
			120	10.2	20.1	10.1	19.6	2.6	16.8
			240	4.3	10.6	1.9	8.7	1.3	5.6

## Sheet: table3-3、3-4
		闭合压力/MPa	稠化水压裂液体系			胍胶压裂液体系
			导流能力/ （μm2·cm）	导流保持率/%	导流伤害率/%	导流能力/ （μm2·cm）	导流保持率/%	导流伤害率/%
		5	150.4	82.3	17.6	120.1	61.2	40.2
		10	130.6	83.1	15.3	100.6	62.3	30.7
		20	100.3	84.5	12.1	78.6	63.2	27.6
		30	80.1	84.7	10.1	53.1	64.7	16.1
		40	50.6	86.2	8.9	26.3	65.1	12.8

## Sheet: table3-5 3-6
			剪切	稠化水	胍胶		温度	稠化水	胍胶
			0	120	120		30	120	120
			10	119	113		40	108	110
			20	119.8	108		50	106	108
			30	119.6	90		60	102	106
			40	119.2	82		70	80	100
			50	118.9	70		80	40	98
			60	118.2	69		90	30	98

## Sheet: table 4-1 4-2 4-3
	A1
	日期	日产液	日产油	含水
	2017-06-29	14.66	4.66188	68.2
	2017-07-10	12.86	12.0627	6.2
	2017-07-27	12.87	11.9691	7
	2017-08-10	12.34	11.5749	6.2
	2017-08-21	12.9	12.1002	6.2
	2017-08-30	12.9	12.1002	6.2
	2017-09-20	12.9	12.2292	5.2
	2017-09-29	12.9	11.868	8
	2017-10-11	12.9	12.0486	6.6
	2017-10-29	12.8	11.648	9
	2017-11-12	12.8	11.5712	9.6
	2017-11-26	10.88	10.1619	6.6
	2017-12-13	10.88	10.1837	6.4
	A2
	日期	日产液	日产油	含水
	2017-09-03	15.24	0	100
	2017-09-13	15.45	5.24256	65.6
	2017-10-01	10.56	9.53	9.7
	2017-10-04	10.56	9.6096	9
	2017-10-13	10.56	9.59904	9.1
	2017-10-24	8.02	7.35	8.3
	2017-11-04	8.02	7.33028	8.6
	2017-11-14	7.7	7.28216	9.2
	2017-11-24	7.7	7.0301	8.7
	2017-12-11	7.7	7.0686	8.2
	2017-12-14	7.7	7.0378	8.6
	2017-12-24	7.7	7.084	8
	A3
	日期	日产液	日产油	含水
	2017-10-13	16.8	2.9736	82.3
	2017-10-24	9.41	8.71366	7.4
	2017-11-04	9.41	8.51605	9.5
	2017-11-14	9.41	8.74189	7.1
	2017-11-24	9.41	8.79835	6.5
	2017-12-04	8.23	7.69505	6.5
	2017-12-14	9.41	8.74189	7.1
	2017-12-24	9.41	8.93009	5.1
